# Supplementary material for: Quantitative Proteomic and Transcriptomic Study on Autotetraploid Paulownia and Its Diploid Parent Reveal Key Metabolic Processes Associated with Paulownia Autotetraploidization
Source: Front Plant Sci. 2016 Jun 24;7:892. doi: 10.3389/fpls.2016.00892 (PMC4919355; doi:10.3389/fpls.2016.00892)
Supplement: Table S5 — Proteins changed noteworthyly in expression levels with corresponding in transcript level in the comparison of Y4 vs. Y2. Same trend were marked in red while opposite ones in green. [file Table5.XLSX]

## Sheet: same
Table S5 Proteins changed noteworthyly in expression levels with corresponding in transcript level in the comparison of Y4 vs. Y2 Same trend were marked in red while opposite ones in green.
Protein_Acc	Description	Quantition(Y4/Y2)	Sig	diff_Protein	Correlation_Acc	GeneID	log2(Y4/Y2)	Fdr	diff_gene
CL370.Contig2_All	228 920 ferritin, plant, putative [Ricinus communis] >gi|223533968|gb|EEF35690.1| ferritin, plant, putative [Ricinus communis]	1.401	0.01	+	CL370.Contig2_All	CL370.Contig2_All	-1.5618	0	-
Unigene12289_All	49 738 minus strand putative germin-like protein [Salvia miltiorrhiza]	0.639	0.01	-	Unigene12289_All	Unigene12289_All	1.2481	5.24e-07	+
CL10277.Contig1_All	91 1161 nutrient reservoir, putative [Ricinus communis] >gi|223529302|gb|EEF31271.1| nutrient reservoir, putative [Ricinus communis]	1.5155	0.01	+	CL10277.Contig1_All	CL10277.Contig1_All	-1.1927	4.68e-25	-
CL1102.Contig3_All	224 1996 cytosolic NADP-malic enzyme [Nicotiana tabacum] >CL1102.Contig5_All 224 1996 minus strand cytosolic NADP-malic enzyme [Nicotiana tabacum]	1.458	0.01	+	CL1102.Contig3_All	CL1102.Contig3_All	-1.5021	9.74e-160	-
CL7849.Contig2_All	1 261 defective in induced resistance 1 protein [Nicotiana tabacum]	0.692	0.01	-	CL7849.Contig2_All	CL7849.Contig2_All	6.2292	0	+
CL7650.Contig2_All	239 1597 predicted protein [Populus trichocarpa] >gi|222861628|gb|EEE99170.1| predicted protein [Populus trichocarpa]	0.883	0.01	-	CL7650.Contig2_All	CL7650.Contig2_All	1.0244	4.33e-212	+
CL10528.Contig1_All	233 2812 minus strand beta-galactosidase STBG2 [Solanum lycopersicum]	1.245	0.01	+	CL10528.Contig1_All	CL10528.Contig1_All	-1.1746	5.36e-98	-
CL2040.Contig1_All	351 1793 minus strand PREDICTED: alanine aminotransferase 2 isoform 1 [Vitis vinifera] >gi|296083415|emb|CBI23368.3| unnamed protein product [Vitis vinifera] >CL2040.Contig2_All 283 1725 minus strand PREDICTED: alanine aminotransferase 2 iso	0.836	0.01	-	CL2040.Contig1_All	CL2040.Contig1_All	1.5628	0	+
CL947.Contig9_All	1753 2034 minus strand PREDICTED: glycyl-tRNA synthetase 1, mitochondrial-like [Vitis vinifera]	1.5785	0.01	+	CL947.Contig9_All	CL947.Contig9_All	-1.9523	0	-
CL1730.Contig1_All	87 2879 minus strand alpha-glucosidase, putative [Ricinus communis] >gi|223528753|gb|EEF30763.1| alpha-glucosidase, putative [Ricinus communis]	1.2105	0.01	+	CL1730.Contig1_All	CL1730.Contig1_All	-1.1709	2.35e-238	-
CL4982.Contig1_All	116 526 PREDICTED: upstream activation factor subunit spp27 [Vitis vinifera]	1.44	0.01	+	CL4982.Contig1_All	CL4982.Contig1_All	-1.0178	8.49e-17	-
Unigene10313_All	98 796 hypothetical protein VITISV_003162 [Vitis vinifera]	0.6965	0.01	-	Unigene10313_All	Unigene10313_All	1.6057	3.62e-55	+
CL4808.Contig1_All	168 704 minus strand ribulose-1,5-bisphosphate carboxylase/oxygenase small subunit [Panax ginseng]	0.845	0.01	-	CL4808.Contig1_All	CL4808.Contig1_All	1.6064	0	+
CL9826.Contig3_All	70 1110 PREDICTED: xylem cysteine proteinase 2-like [Glycine max]	2.4095	0.01	+	CL9826.Contig3_All	CL9826.Contig3_All	-2.6744	1.87e-230	-
CL2658.Contig1_All	176 1408 minus strand NADP-dependent isocitrate dehydrogenase [Passiflora edulis]	1.28	0.01	+	CL2658.Contig1_All	CL2658.Contig1_All	-2.29	0	-
Unigene12262_All	21 668 minus strand PREDICTED: ripening-related protein grip22-like [Vitis vinifera]	0.5745	0.01	-	Unigene12262_All	Unigene12262_All	1.6214	5.7e-12	+
Unigene8169_All	163 714 chloroplast methionine sulfoxide reductase B1 precursor [Nicotiana tabacum]	0.7495	0.01	-	Unigene8169_All	Unigene8169_All	2.7398	1.65e-186	+
CL5483.Contig2_All	195 1253 minus strand malate dehydrogenase [Perilla frutescens]	0.7535	0.01	-	CL5483.Contig2_All	CL5483.Contig2_All	1.432	2.63e-140	+
CL964.Contig4_All	247 1443 minus strand PREDICTED: fasciclin-like arabinogalactan protein 1-like [Vitis vinifera]	0.729	0.01	-	CL964.Contig4_All	CL964.Contig4_All	1.2072	6.23e-109	+
Unigene14921_All	185 1186 PREDICTED: haloalkane dehalogenase [Vitis vinifera] >gi|297743495|emb|CBI36362.3| unnamed protein product [Vitis vinifera]	0.743	0.01	-	Unigene14921_All	Unigene14921_All	1.7314	1.15e-197	+
CL2038.Contig1_All	52 1062 minus strand conserved hypothetical protein [Ricinus communis] >gi|223543920|gb|EEF45446.1| conserved hypothetical protein [Ricinus communis]	0.7505	0.01	-	CL2038.Contig1_All	CL2038.Contig1_All	1.8132	1.28e-133	+
Unigene18877_All	245 625 minus strand PREDICTED: putative lipid-binding protein At4g00165 [Vitis vinifera]	0.4425	0.01	-	Unigene18877_All	Unigene18877_All	2.689	0	+
CL7070.Contig1_All	774 1106 minus strand PREDICTED: psbP domain-containing protein 4, chloroplastic [Vitis vinifera] >gi|302142754|emb|CBI19957.3| unnamed protein product [Vitis vinifera]	0.8065	0.01	-	CL7070.Contig1_All	CL7070.Contig1_All	1.6581	1.8e-45	+
CL11214.Contig1_All	63 515 major latex-like protein [Panax ginseng]	1.5485	0.01	+	CL11214.Contig1_All	CL11214.Contig1_All	-1.4076	0	-
CL3549.Contig3_All	96 542 PREDICTED: calmodulin isoform 2 [Vitis vinifera] >gi|147783668|emb|CAN72522.1| hypothetical protein VITISV_019208 [Vitis vinifera] >gi|296088807|emb|CBI38257.3| unnamed protein product [Vitis vinifera]	1.3295	0.01	+	CL3549.Contig3_All	CL3549.Contig3_All	-1.4552	5.12e-109	-
CL4086.Contig2_All	246 1598 glyceraldehyde-3-phosphate dehydrogenase B [Scoparia dulcis]	0.6745	0.01	-	CL4086.Contig2_All	CL4086.Contig2_All	1.9978	0	+
Unigene10108_All	171 965 unnamed protein product [Vitis vinifera]	1.288	0.01	+	Unigene10108_All	Unigene10108_All	-1.0585	2.45e-226	-
CL3623.Contig4_All	180 1592 PREDICTED: ribulose bisphosphate carboxylase/oxygenase activase 1, chloroplastic-like [Vitis vinifera] >gi|297740331|emb|CBI30513.3| unnamed protein product [Vitis vinifera]	0.5305	0.01	-	CL3623.Contig4_All	CL3623.Contig4_All	3.3158	0	+
CL1196.Contig2_All	157 1092 RecName: Full=Light-induced protein, chloroplastic; AltName: Full=Drought-induced stress protein CDSP-34; Flags: Precursor >gi|2598049|emb|CAA75558.1| chloroplast drought-induced stress protein, 34 kD) [Solanum tuberosum]	0.707	0.01	-	CL1196.Contig2_All	CL1196.Contig2_All	1.4508	6.32e-108	+
Unigene11698_All	254 2245 minus strand arabinosidase ARA-1 [Solanum lycopersicum]	1.359	0.01	+	Unigene11698_All	Unigene11698_All	-1.3918	4.93e-108	-
CL8179.Contig2_All	150 1211 RecName: Full=Thiamine thiazole synthase 2, chloroplastic; AltName: Full=Thiazole biosynthetic enzyme 2; Flags: Precursor	1.354	0.01	+	CL8179.Contig2_All	CL8179.Contig2_All	-2.2925	0	-
CL432.Contig1_All	119 577 minus strand elicitor-inducible protein EIG-J7 [Capsicum annuum]	1.2915	0.01	+	CL432.Contig1_All	CL432.Contig1_All	-1.5221	0	-
Unigene1613_All	189 863 minus strand conserved hypothetical protein [Ricinus communis] >gi|223535122|gb|EEF36802.1| conserved hypothetical protein [Ricinus communis]	0.64	0.01	-	Unigene1613_All	Unigene1613_All	1.2217	0	+
Unigene5820_All	35 769 minus strand bifunctional inhibitor/lipid-transfer protein/seed storage 2S albumin-like protein [Arabidopsis thaliana] >gi|30678667|ref|NP_849949.1| bifunctional inhibitor/lipid-transfer protein/seed storage 2S albumin-like protein [Arabi	0.52	0.01	-	Unigene5820_All	Unigene5820_All	1.8354	0	+
CL7313.Contig2_All	200 1168 minus strand PREDICTED: PGR5-like protein 1A, chloroplastic-like [Vitis vinifera]	0.8015	0.01	-	CL7313.Contig2_All	CL7313.Contig2_All	1.7598	1.29e-235	+
CL7008.Contig2_All	23 934 PREDICTED: uroporphyrinogen-III synthase, chloroplastic-like [Vitis vinifera] >gi|302142364|emb|CBI19567.3| unnamed protein product [Vitis vinifera]	0.7305	0.01	-	CL7008.Contig2_All	CL7008.Contig2_All	1.4548	5.31e-24	+
CL456.Contig1_All	155 2032 minus strand PREDICTED: lysosomal beta glucosidase-like [Vitis vinifera]	1.759	0.01	+	CL456.Contig1_All	CL456.Contig1_All	-1.7728	0	-
CL7680.Contig2_All	158 628 conserved hypothetical protein [Ricinus communis] >gi|223541532|gb|EEF43081.1| conserved hypothetical protein [Ricinus communis]	1.4015	0.01	+	CL7680.Contig2_All	CL7680.Contig2_All	-1.1607	1.43e-214	-
Unigene1492_All	96 1325 PREDICTED: DEAD-box ATP-dependent RNA helicase 56-like [Vitis vinifera]	1.4485	0.01	+	Unigene1492_All	Unigene1492_All	-1.2669	4.92e-24	-
Unigene10236_All	104 1138 PREDICTED: GDSL esterase/lipase At1g29670 [Vitis vinifera] >gi|297735754|emb|CBI18441.3| unnamed protein product [Vitis vinifera]	0.597	0.01	-	Unigene10236_All	Unigene10236_All	1.4776	5.2e-22	+
Unigene8879_All	51 1016 minus strand anionic peroxidase swpa7 [Ipomoea batatas]	0.7505	0.01	-	Unigene8879_All	Unigene8879_All	2.0614	1.89e-27	+
CL6209.Contig2_All	201 830 germin-like protein [Chimonanthus praecox]	0.727	0.01	-	CL6209.Contig2_All	CL6209.Contig2_All	7.3256	0	+
CL2667.Contig2_All	478 1191 hypothetical protein [Plantago major]	1.219	0.01	+	CL2667.Contig2_All	CL2667.Contig2_All	-1.4163	1.68e-229	-
CL6069.Contig2_All	33 1325 PREDICTED: protease Do-like 1, chloroplastic-like [Vitis vinifera] >gi|296081154|emb|CBI18180.3| unnamed protein product [Vitis vinifera]	0.6265	0.01	-	CL6069.Contig2_All	CL6069.Contig2_All	1.7048	5.95e-259	+
CL10549.Contig2_All	2 229 minus strand conserved hypothetical protein [Ricinus communis] >gi|223525379|gb|EEF27989.1| conserved hypothetical protein [Ricinus communis]	0.601	0.01	-	CL10549.Contig2_All	CL10549.Contig2_All	1.2189	0.000633	+
CL964.Contig3_All	4 690 minus strand PREDICTED: fasciclin-like arabinogalactan protein 1-like [Vitis vinifera]	0.6935	0.01	-	CL964.Contig3_All	CL964.Contig3_All	1.2428	0.0008	+
CL2968.Contig1_All	155 1588 minus strand Xylose isomerase, putative [Ricinus communis] >gi|223527883|gb|EEF29973.1| Xylose isomerase, putative [Ricinus communis]	1.3775	0.01	+	CL2968.Contig1_All	CL2968.Contig1_All	-1.2107	3.43e-88	-
Unigene16285_All	141 1577 minus strand catalytic, putative [Ricinus communis] >gi|223528862|gb|EEF30863.1| catalytic, putative [Ricinus communis]	2.1475	0.01	+	Unigene16285_All	Unigene16285_All	-1.2687	8.22e-39	-
CL370.Contig2_All	228 920 ferritin, plant, putative [Ricinus communis] >gi|223533968|gb|EEF35690.1| ferritin, plant, putative [Ricinus communis]	1.401	0.01	+	CL370.Contig2_All	CL370.Contig2_All	-1.5618	0	-
Unigene12289_All	49 738 minus strand putative germin-like protein [Salvia miltiorrhiza]	0.639	0.01	-	Unigene12289_All	Unigene12289_All	1.2481	5.24e-07	+
CL10277.Contig1_All	91 1161 nutrient reservoir, putative [Ricinus communis] >gi|223529302|gb|EEF31271.1| nutrient reservoir, putative [Ricinus communis]	1.5155	0.01	+	CL10277.Contig1_All	CL10277.Contig1_All	-1.1927	4.68e-25	-
CL1102.Contig3_All	224 1996 cytosolic NADP-malic enzyme [Nicotiana tabacum] >CL1102.Contig5_All 224 1996 minus strand cytosolic NADP-malic enzyme [Nicotiana tabacum]	1.458	0.01	+	CL1102.Contig3_All	CL1102.Contig3_All	-1.5021	9.74e-160	-
CL7849.Contig2_All	1 261 defective in induced resistance 1 protein [Nicotiana tabacum]	0.692	0.01	-	CL7849.Contig2_All	CL7849.Contig2_All	6.2292	0	+
CL7650.Contig2_All	239 1597 predicted protein [Populus trichocarpa] >gi|222861628|gb|EEE99170.1| predicted protein [Populus trichocarpa]	0.883	0.01	-	CL7650.Contig2_All	CL7650.Contig2_All	1.0244	4.33e-212	+
CL10528.Contig1_All	233 2812 minus strand beta-galactosidase STBG2 [Solanum lycopersicum]	1.245	0.01	+	CL10528.Contig1_All	CL10528.Contig1_All	-1.1746	5.36e-98	-
CL2040.Contig1_All	351 1793 minus strand PREDICTED: alanine aminotransferase 2 isoform 1 [Vitis vinifera] >gi|296083415|emb|CBI23368.3| unnamed protein product [Vitis vinifera] >CL2040.Contig2_All 283 1725 minus strand PREDICTED: alanine aminotransferase 2 iso	0.836	0.01	-	CL2040.Contig1_All	CL2040.Contig1_All	1.5628	0	+
CL947.Contig9_All	1753 2034 minus strand PREDICTED: glycyl-tRNA synthetase 1, mitochondrial-like [Vitis vinifera]	1.5785	0.01	+	CL947.Contig9_All	CL947.Contig9_All	-1.9523	0	-
CL1730.Contig1_All	87 2879 minus strand alpha-glucosidase, putative [Ricinus communis] >gi|223528753|gb|EEF30763.1| alpha-glucosidase, putative [Ricinus communis]	1.2105	0.01	+	CL1730.Contig1_All	CL1730.Contig1_All	-1.1709	2.35e-238	-
CL4982.Contig1_All	116 526 PREDICTED: upstream activation factor subunit spp27 [Vitis vinifera]	1.44	0.01	+	CL4982.Contig1_All	CL4982.Contig1_All	-1.0178	8.49e-17	-
Unigene10313_All	98 796 hypothetical protein VITISV_003162 [Vitis vinifera]	0.6965	0.01	-	Unigene10313_All	Unigene10313_All	1.6057	3.62e-55	+
CL4808.Contig1_All	168 704 minus strand ribulose-1,5-bisphosphate carboxylase/oxygenase small subunit [Panax ginseng]	0.845	0.01	-	CL4808.Contig1_All	CL4808.Contig1_All	1.6064	0	+
CL9826.Contig3_All	70 1110 PREDICTED: xylem cysteine proteinase 2-like [Glycine max]	2.4095	0.01	+	CL9826.Contig3_All	CL9826.Contig3_All	-2.6744	1.87e-230	-
CL2658.Contig1_All	176 1408 minus strand NADP-dependent isocitrate dehydrogenase [Passiflora edulis]	1.28	0.01	+	CL2658.Contig1_All	CL2658.Contig1_All	-2.29	0	-
Unigene12262_All	21 668 minus strand PREDICTED: ripening-related protein grip22-like [Vitis vinifera]	0.5745	0.01	-	Unigene12262_All	Unigene12262_All	1.6214	5.7e-12	+
Unigene8169_All	163 714 chloroplast methionine sulfoxide reductase B1 precursor [Nicotiana tabacum]	0.7495	0.01	-	Unigene8169_All	Unigene8169_All	2.7398	1.65e-186	+
CL5483.Contig2_All	195 1253 minus strand malate dehydrogenase [Perilla frutescens]	0.7535	0.01	-	CL5483.Contig2_All	CL5483.Contig2_All	1.432	2.63e-140	+
CL964.Contig4_All	247 1443 minus strand PREDICTED: fasciclin-like arabinogalactan protein 1-like [Vitis vinifera]	0.729	0.01	-	CL964.Contig4_All	CL964.Contig4_All	1.2072	6.23e-109	+
Unigene14921_All	185 1186 PREDICTED: haloalkane dehalogenase [Vitis vinifera] >gi|297743495|emb|CBI36362.3| unnamed protein product [Vitis vinifera]	0.743	0.01	-	Unigene14921_All	Unigene14921_All	1.7314	1.15e-197	+
CL2038.Contig1_All	52 1062 minus strand conserved hypothetical protein [Ricinus communis] >gi|223543920|gb|EEF45446.1| conserved hypothetical protein [Ricinus communis]	0.7505	0.01	-	CL2038.Contig1_All	CL2038.Contig1_All	1.8132	1.28e-133	+
Unigene18877_All	245 625 minus strand PREDICTED: putative lipid-binding protein At4g00165 [Vitis vinifera]	0.4425	0.01	-	Unigene18877_All	Unigene18877_All	2.689	0	+
CL7070.Contig1_All	774 1106 minus strand PREDICTED: psbP domain-containing protein 4, chloroplastic [Vitis vinifera] >gi|302142754|emb|CBI19957.3| unnamed protein product [Vitis vinifera]	0.8065	0.01	-	CL7070.Contig1_All	CL7070.Contig1_All	1.6581	1.8e-45	+
CL11214.Contig1_All	63 515 major latex-like protein [Panax ginseng]	1.5485	0.01	+	CL11214.Contig1_All	CL11214.Contig1_All	-1.4076	0	-
CL3549.Contig3_All	96 542 PREDICTED: calmodulin isoform 2 [Vitis vinifera] >gi|147783668|emb|CAN72522.1| hypothetical protein VITISV_019208 [Vitis vinifera] >gi|296088807|emb|CBI38257.3| unnamed protein product [Vitis vinifera]	1.3295	0.01	+	CL3549.Contig3_All	CL3549.Contig3_All	-1.4552	5.12e-109	-
CL4086.Contig2_All	246 1598 glyceraldehyde-3-phosphate dehydrogenase B [Scoparia dulcis]	0.6745	0.01	-	CL4086.Contig2_All	CL4086.Contig2_All	1.9978	0	+
Unigene10108_All	171 965 unnamed protein product [Vitis vinifera]	1.288	0.01	+	Unigene10108_All	Unigene10108_All	-1.0585	2.45e-226	-
CL3623.Contig4_All	180 1592 PREDICTED: ribulose bisphosphate carboxylase/oxygenase activase 1, chloroplastic-like [Vitis vinifera] >gi|297740331|emb|CBI30513.3| unnamed protein product [Vitis vinifera]	0.5305	0.01	-	CL3623.Contig4_All	CL3623.Contig4_All	3.3158	0	+
CL1196.Contig2_All	157 1092 RecName: Full=Light-induced protein, chloroplastic; AltName: Full=Drought-induced stress protein CDSP-34; Flags: Precursor >gi|2598049|emb|CAA75558.1| chloroplast drought-induced stress protein, 34 kD) [Solanum tuberosum]	0.707	0.01	-	CL1196.Contig2_All	CL1196.Contig2_All	1.4508	6.32e-108	+
Unigene11698_All	254 2245 minus strand arabinosidase ARA-1 [Solanum lycopersicum]	1.359	0.01	+	Unigene11698_All	Unigene11698_All	-1.3918	4.93e-108	-
CL8179.Contig2_All	150 1211 RecName: Full=Thiamine thiazole synthase 2, chloroplastic; AltName: Full=Thiazole biosynthetic enzyme 2; Flags: Precursor	1.354	0.01	+	CL8179.Contig2_All	CL8179.Contig2_All	-2.2925	0	-
CL432.Contig1_All	119 577 minus strand elicitor-inducible protein EIG-J7 [Capsicum annuum]	1.2915	0.01	+	CL432.Contig1_All	CL432.Contig1_All	-1.5221	0	-
Unigene1613_All	189 863 minus strand conserved hypothetical protein [Ricinus communis] >gi|223535122|gb|EEF36802.1| conserved hypothetical protein [Ricinus communis]	0.64	0.01	-	Unigene1613_All	Unigene1613_All	1.2217	0	+
Unigene5820_All	35 769 minus strand bifunctional inhibitor/lipid-transfer protein/seed storage 2S albumin-like protein [Arabidopsis thaliana] >gi|30678667|ref|NP_849949.1| bifunctional inhibitor/lipid-transfer protein/seed storage 2S albumin-like protein [Arabi	0.52	0.01	-	Unigene5820_All	Unigene5820_All	1.8354	0	+
CL7313.Contig2_All	200 1168 minus strand PREDICTED: PGR5-like protein 1A, chloroplastic-like [Vitis vinifera]	0.8015	0.01	-	CL7313.Contig2_All	CL7313.Contig2_All	1.7598	1.29e-235	+
CL7008.Contig2_All	23 934 PREDICTED: uroporphyrinogen-III synthase, chloroplastic-like [Vitis vinifera] >gi|302142364|emb|CBI19567.3| unnamed protein product [Vitis vinifera]	0.7305	0.01	-	CL7008.Contig2_All	CL7008.Contig2_All	1.4548	5.31e-24	+
CL456.Contig1_All	155 2032 minus strand PREDICTED: lysosomal beta glucosidase-like [Vitis vinifera]	1.759	0.01	+	CL456.Contig1_All	CL456.Contig1_All	-1.7728	0	-
CL7680.Contig2_All	158 628 conserved hypothetical protein [Ricinus communis] >gi|223541532|gb|EEF43081.1| conserved hypothetical protein [Ricinus communis]	1.4015	0.01	+	CL7680.Contig2_All	CL7680.Contig2_All	-1.1607	1.43e-214	-
Unigene1492_All	96 1325 PREDICTED: DEAD-box ATP-dependent RNA helicase 56-like [Vitis vinifera]	1.4485	0.01	+	Unigene1492_All	Unigene1492_All	-1.2669	4.92e-24	-
Unigene10236_All	104 1138 PREDICTED: GDSL esterase/lipase At1g29670 [Vitis vinifera] >gi|297735754|emb|CBI18441.3| unnamed protein product [Vitis vinifera]	0.597	0.01	-	Unigene10236_All	Unigene10236_All	1.4776	5.2e-22	+
Unigene8879_All	51 1016 minus strand anionic peroxidase swpa7 [Ipomoea batatas]	0.7505	0.01	-	Unigene8879_All	Unigene8879_All	2.0614	1.89e-27	+
CL6209.Contig2_All	201 830 germin-like protein [Chimonanthus praecox]	0.727	0.01	-	CL6209.Contig2_All	CL6209.Contig2_All	7.3256	0	+
CL2667.Contig2_All	478 1191 hypothetical protein [Plantago major]	1.219	0.01	+	CL2667.Contig2_All	CL2667.Contig2_All	-1.4163	1.68e-229	-
CL6069.Contig2_All	33 1325 PREDICTED: protease Do-like 1, chloroplastic-like [Vitis vinifera] >gi|296081154|emb|CBI18180.3| unnamed protein product [Vitis vinifera]	0.6265	0.01	-	CL6069.Contig2_All	CL6069.Contig2_All	1.7048	5.95e-259	+
CL10549.Contig2_All	2 229 minus strand conserved hypothetical protein [Ricinus communis] >gi|223525379|gb|EEF27989.1| conserved hypothetical protein [Ricinus communis]	0.601	0.01	-	CL10549.Contig2_All	CL10549.Contig2_All	1.2189	0.000633	+
CL964.Contig3_All	4 690 minus strand PREDICTED: fasciclin-like arabinogalactan protein 1-like [Vitis vinifera]	0.6935	0.01	-	CL964.Contig3_All	CL964.Contig3_All	1.2428	0.0008	+
CL2968.Contig1_All	155 1588 minus strand Xylose isomerase, putative [Ricinus communis] >gi|223527883|gb|EEF29973.1| Xylose isomerase, putative [Ricinus communis]	1.3775	0.01	+	CL2968.Contig1_All	CL2968.Contig1_All	-1.2107	3.43e-88	-
Unigene16285_All	141 1577 minus strand catalytic, putative [Ricinus communis] >gi|223528862|gb|EEF30863.1| catalytic, putative [Ricinus communis]	2.1475	0.01	+	Unigene16285_All	Unigene16285_All	-1.2687	8.22e-39	-

## Sheet: opposite
Table S5 Proteins changed noteworthyly in expression levels with opposite trend in transcript level in the comparison of Y4 vs. Y2
Protein_Acc	Description	Quantition(Y4/Y2)	Sig	diff_Protein	Correlation_Acc	GeneID	log2(Y4/Y2)	Fdr	diff_gene
CL370.Contig2_All	228 920 ferritin, plant, putative [Ricinus communis] >gi|223533968|gb|EEF35690.1| ferritin, plant, putative [Ricinus communis]	1.401	0.01	+	CL370.Contig2_All	CL370.Contig2_All	-1.5618	0	-
Unigene12289_All	49 738 minus strand putative germin-like protein [Salvia miltiorrhiza]	0.639	0.01	-	Unigene12289_All	Unigene12289_All	1.2481	5.24e-07	+
CL10277.Contig1_All	91 1161 nutrient reservoir, putative [Ricinus communis] >gi|223529302|gb|EEF31271.1| nutrient reservoir, putative [Ricinus communis]	1.5155	0.01	+	CL10277.Contig1_All	CL10277.Contig1_All	-1.1927	4.68e-25	-
CL1102.Contig3_All	224 1996 cytosolic NADP-malic enzyme [Nicotiana tabacum] >CL1102.Contig5_All 224 1996 minus strand cytosolic NADP-malic enzyme [Nicotiana tabacum]	1.458	0.01	+	CL1102.Contig3_All	CL1102.Contig3_All	-1.5021	9.74e-160	-
CL7849.Contig2_All	1 261 defective in induced resistance 1 protein [Nicotiana tabacum]	0.692	0.01	-	CL7849.Contig2_All	CL7849.Contig2_All	6.2292	0	+
CL7650.Contig2_All	239 1597 predicted protein [Populus trichocarpa] >gi|222861628|gb|EEE99170.1| predicted protein [Populus trichocarpa]	0.883	0.01	-	CL7650.Contig2_All	CL7650.Contig2_All	1.0244	4.33e-212	+
CL10528.Contig1_All	233 2812 minus strand beta-galactosidase STBG2 [Solanum lycopersicum]	1.245	0.01	+	CL10528.Contig1_All	CL10528.Contig1_All	-1.1746	5.36e-98	-
CL2040.Contig1_All	351 1793 minus strand PREDICTED: alanine aminotransferase 2 isoform 1 [Vitis vinifera] >gi|296083415|emb|CBI23368.3| unnamed protein product [Vitis vinifera] >CL2040.Contig2_All 283 1725 minus strand PREDICTED: alanine aminotransferase 2 iso	0.836	0.01	-	CL2040.Contig1_All	CL2040.Contig1_All	1.5628	0	+
CL947.Contig9_All	1753 2034 minus strand PREDICTED: glycyl-tRNA synthetase 1, mitochondrial-like [Vitis vinifera]	1.5785	0.01	+	CL947.Contig9_All	CL947.Contig9_All	-1.9523	0	-
CL1730.Contig1_All	87 2879 minus strand alpha-glucosidase, putative [Ricinus communis] >gi|223528753|gb|EEF30763.1| alpha-glucosidase, putative [Ricinus communis]	1.2105	0.01	+	CL1730.Contig1_All	CL1730.Contig1_All	-1.1709	2.35e-238	-
CL4982.Contig1_All	116 526 PREDICTED: upstream activation factor subunit spp27 [Vitis vinifera]	1.44	0.01	+	CL4982.Contig1_All	CL4982.Contig1_All	-1.0178	8.49e-17	-
Unigene10313_All	98 796 hypothetical protein VITISV_003162 [Vitis vinifera]	0.6965	0.01	-	Unigene10313_All	Unigene10313_All	1.6057	3.62e-55	+
CL4808.Contig1_All	168 704 minus strand ribulose-1,5-bisphosphate carboxylase/oxygenase small subunit [Panax ginseng]	0.845	0.01	-	CL4808.Contig1_All	CL4808.Contig1_All	1.6064	0	+
CL9826.Contig3_All	70 1110 PREDICTED: xylem cysteine proteinase 2-like [Glycine max]	2.4095	0.01	+	CL9826.Contig3_All	CL9826.Contig3_All	-2.6744	1.87e-230	-
CL2658.Contig1_All	176 1408 minus strand NADP-dependent isocitrate dehydrogenase [Passiflora edulis]	1.28	0.01	+	CL2658.Contig1_All	CL2658.Contig1_All	-2.29	0	-
Unigene12262_All	21 668 minus strand PREDICTED: ripening-related protein grip22-like [Vitis vinifera]	0.5745	0.01	-	Unigene12262_All	Unigene12262_All	1.6214	5.7e-12	+
Unigene8169_All	163 714 chloroplast methionine sulfoxide reductase B1 precursor [Nicotiana tabacum]	0.7495	0.01	-	Unigene8169_All	Unigene8169_All	2.7398	1.65e-186	+
CL5483.Contig2_All	195 1253 minus strand malate dehydrogenase [Perilla frutescens]	0.7535	0.01	-	CL5483.Contig2_All	CL5483.Contig2_All	1.432	2.63e-140	+
CL964.Contig4_All	247 1443 minus strand PREDICTED: fasciclin-like arabinogalactan protein 1-like [Vitis vinifera]	0.729	0.01	-	CL964.Contig4_All	CL964.Contig4_All	1.2072	6.23e-109	+
Unigene14921_All	185 1186 PREDICTED: haloalkane dehalogenase [Vitis vinifera] >gi|297743495|emb|CBI36362.3| unnamed protein product [Vitis vinifera]	0.743	0.01	-	Unigene14921_All	Unigene14921_All	1.7314	1.15e-197	+
CL2038.Contig1_All	52 1062 minus strand conserved hypothetical protein [Ricinus communis] >gi|223543920|gb|EEF45446.1| conserved hypothetical protein [Ricinus communis]	0.7505	0.01	-	CL2038.Contig1_All	CL2038.Contig1_All	1.8132	1.28e-133	+
Unigene18877_All	245 625 minus strand PREDICTED: putative lipid-binding protein At4g00165 [Vitis vinifera]	0.4425	0.01	-	Unigene18877_All	Unigene18877_All	2.689	0	+
CL7070.Contig1_All	774 1106 minus strand PREDICTED: psbP domain-containing protein 4, chloroplastic [Vitis vinifera] >gi|302142754|emb|CBI19957.3| unnamed protein product [Vitis vinifera]	0.8065	0.01	-	CL7070.Contig1_All	CL7070.Contig1_All	1.6581	1.8e-45	+
CL11214.Contig1_All	63 515 major latex-like protein [Panax ginseng]	1.5485	0.01	+	CL11214.Contig1_All	CL11214.Contig1_All	-1.4076	0	-
CL3549.Contig3_All	96 542 PREDICTED: calmodulin isoform 2 [Vitis vinifera] >gi|147783668|emb|CAN72522.1| hypothetical protein VITISV_019208 [Vitis vinifera] >gi|296088807|emb|CBI38257.3| unnamed protein product [Vitis vinifera]	1.3295	0.01	+	CL3549.Contig3_All	CL3549.Contig3_All	-1.4552	5.12e-109	-
CL4086.Contig2_All	246 1598 glyceraldehyde-3-phosphate dehydrogenase B [Scoparia dulcis]	0.6745	0.01	-	CL4086.Contig2_All	CL4086.Contig2_All	1.9978	0	+
Unigene10108_All	171 965 unnamed protein product [Vitis vinifera]	1.288	0.01	+	Unigene10108_All	Unigene10108_All	-1.0585	2.45e-226	-
CL3623.Contig4_All	180 1592 PREDICTED: ribulose bisphosphate carboxylase/oxygenase activase 1, chloroplastic-like [Vitis vinifera] >gi|297740331|emb|CBI30513.3| unnamed protein product [Vitis vinifera]	0.5305	0.01	-	CL3623.Contig4_All	CL3623.Contig4_All	3.3158	0	+
CL1196.Contig2_All	157 1092 RecName: Full=Light-induced protein, chloroplastic; AltName: Full=Drought-induced stress protein CDSP-34; Flags: Precursor >gi|2598049|emb|CAA75558.1| chloroplast drought-induced stress protein, 34 kD) [Solanum tuberosum]	0.707	0.01	-	CL1196.Contig2_All	CL1196.Contig2_All	1.4508	6.32e-108	+
Unigene11698_All	254 2245 minus strand arabinosidase ARA-1 [Solanum lycopersicum]	1.359	0.01	+	Unigene11698_All	Unigene11698_All	-1.3918	4.93e-108	-
CL8179.Contig2_All	150 1211 RecName: Full=Thiamine thiazole synthase 2, chloroplastic; AltName: Full=Thiazole biosynthetic enzyme 2; Flags: Precursor	1.354	0.01	+	CL8179.Contig2_All	CL8179.Contig2_All	-2.2925	0	-
CL432.Contig1_All	119 577 minus strand elicitor-inducible protein EIG-J7 [Capsicum annuum]	1.2915	0.01	+	CL432.Contig1_All	CL432.Contig1_All	-1.5221	0	-
Unigene1613_All	189 863 minus strand conserved hypothetical protein [Ricinus communis] >gi|223535122|gb|EEF36802.1| conserved hypothetical protein [Ricinus communis]	0.64	0.01	-	Unigene1613_All	Unigene1613_All	1.2217	0	+
Unigene5820_All	35 769 minus strand bifunctional inhibitor/lipid-transfer protein/seed storage 2S albumin-like protein [Arabidopsis thaliana] >gi|30678667|ref|NP_849949.1| bifunctional inhibitor/lipid-transfer protein/seed storage 2S albumin-like protein [Arabi	0.52	0.01	-	Unigene5820_All	Unigene5820_All	1.8354	0	+
CL7313.Contig2_All	200 1168 minus strand PREDICTED: PGR5-like protein 1A, chloroplastic-like [Vitis vinifera]	0.8015	0.01	-	CL7313.Contig2_All	CL7313.Contig2_All	1.7598	1.29e-235	+
CL7008.Contig2_All	23 934 PREDICTED: uroporphyrinogen-III synthase, chloroplastic-like [Vitis vinifera] >gi|302142364|emb|CBI19567.3| unnamed protein product [Vitis vinifera]	0.7305	0.01	-	CL7008.Contig2_All	CL7008.Contig2_All	1.4548	5.31e-24	+
CL456.Contig1_All	155 2032 minus strand PREDICTED: lysosomal beta glucosidase-like [Vitis vinifera]	1.759	0.01	+	CL456.Contig1_All	CL456.Contig1_All	-1.7728	0	-
CL7680.Contig2_All	158 628 conserved hypothetical protein [Ricinus communis] >gi|223541532|gb|EEF43081.1| conserved hypothetical protein [Ricinus communis]	1.4015	0.01	+	CL7680.Contig2_All	CL7680.Contig2_All	-1.1607	1.43e-214	-
Unigene1492_All	96 1325 PREDICTED: DEAD-box ATP-dependent RNA helicase 56-like [Vitis vinifera]	1.4485	0.01	+	Unigene1492_All	Unigene1492_All	-1.2669	4.92e-24	-
Unigene10236_All	104 1138 PREDICTED: GDSL esterase/lipase At1g29670 [Vitis vinifera] >gi|297735754|emb|CBI18441.3| unnamed protein product [Vitis vinifera]	0.597	0.01	-	Unigene10236_All	Unigene10236_All	1.4776	5.2e-22	+
Unigene8879_All	51 1016 minus strand anionic peroxidase swpa7 [Ipomoea batatas]	0.7505	0.01	-	Unigene8879_All	Unigene8879_All	2.0614	1.89e-27	+
CL6209.Contig2_All	201 830 germin-like protein [Chimonanthus praecox]	0.727	0.01	-	CL6209.Contig2_All	CL6209.Contig2_All	7.3256	0	+
CL2667.Contig2_All	478 1191 hypothetical protein [Plantago major]	1.219	0.01	+	CL2667.Contig2_All	CL2667.Contig2_All	-1.4163	1.68e-229	-
CL6069.Contig2_All	33 1325 PREDICTED: protease Do-like 1, chloroplastic-like [Vitis vinifera] >gi|296081154|emb|CBI18180.3| unnamed protein product [Vitis vinifera]	0.6265	0.01	-	CL6069.Contig2_All	CL6069.Contig2_All	1.7048	5.95e-259	+
CL10549.Contig2_All	2 229 minus strand conserved hypothetical protein [Ricinus communis] >gi|223525379|gb|EEF27989.1| conserved hypothetical protein [Ricinus communis]	0.601	0.01	-	CL10549.Contig2_All	CL10549.Contig2_All	1.2189	0.000633	+
CL964.Contig3_All	4 690 minus strand PREDICTED: fasciclin-like arabinogalactan protein 1-like [Vitis vinifera]	0.6935	0.01	-	CL964.Contig3_All	CL964.Contig3_All	1.2428	0.0008	+
CL2968.Contig1_All	155 1588 minus strand Xylose isomerase, putative [Ricinus communis] >gi|223527883|gb|EEF29973.1| Xylose isomerase, putative [Ricinus communis]	1.3775	0.01	+	CL2968.Contig1_All	CL2968.Contig1_All	-1.2107	3.43e-88	-
Unigene16285_All	141 1577 minus strand catalytic, putative [Ricinus communis] >gi|223528862|gb|EEF30863.1| catalytic, putative [Ricinus communis]	2.1475	0.01	+	Unigene16285_All	Unigene16285_All	-1.2687	8.22e-39	-
